# Supplementary material for: Quantitative detection of single DNA molecules on DNA tetrahedron decorated substrates
Source: Royal Society of Chemistry journal article supplement (doi:10.1039/c2cc35208g), 2012-01-01
Supplement: c2cc35208g.pdf [file c2cc35208g.pdf]

## Supplementary Information

# Quantitative Detection of Single DNA Molecules on DNA Tetrahedron Decorated Substrates

Zhenguang Wang<sup>a</sup>, Qingwang Xue<sup>a</sup>, Wenzhi Tian<sup>a</sup>, Lei Wang<sup>b,\*</sup>, Wei Jiang<sup>a,\*</sup>

<sup>a</sup> School of Chemistry and Chemical Engineering, Shandong University, 250100

Jinan, P.R. China

<sup>b</sup> School of Pharmacy, Shandong University, 250012 Jinan, P.R. China

Corresponding author: Tel: +86 531 88363888; fax: +86 531 88564464. E-mail:

wjiang@sdu.edu.cn

Tel: +86 531 88382330. Email: wangl-sdu@sdu.edu.cn

## EXPERIMENTAL SECTION

### Materials

All oligonucleotides were synthesized and purified by Sangon (Shanghai, China). The sequences were shown Table S1. 3-glycidyloxypropyltrimethoxysilane (GOPS) was purchased from Sigma-Aldrich Co. (St. Louis, MO, USA). Microscope cover glasses (22 × 22 mm) were purchased from Cole-Parmer (Illinois, USA). QDs605-streptavidin conjugates (QDs) were obtained from Invitrogen Co. (Eugene, OK, USA). Tween-20 from Sigma (St. Louis, MO) was used in the work. All other chemicals were of analytical grade. All chemicals were used without further purification. Human serum was provided by Shandong University Hospital. All solutions were prepared with Milli-Q water (resistivity = 18 MΩ cm) from a Millipore system.

### Self-Assemble of Functional DNA Tetrahedron onto Glass Substrates

The epoxy-functionalized glass slides were prepared according to literatures.<sup>1</sup> DNA tetrahedron was synthesized self-assembly. Four DNA strands (A, B, C and D) were diluted into a final concentration of 50 μM with TE buffer (10 mM Tris, 1 mM EDTA, pH 8.0). A quantity of 2 μL each strand was mixed with 42 μL of TM buffer (20 mM Tris, 50 mM MgCl<sub>2</sub>, pH 8.0), then the mixture was heated to 95 °C for 2 min and cooled in ice bath. Next, 30 μL of the functional DNA tetrahedron (diluted into proper concentration with TM buffer) was added to the epoxy-functionalized glass substrates and allowed to react overnight in 37 °C. Finally, the substrate was rinsed

with phosphate buffered saline (PBS) containing 10 mM PB buffer and 0.1 M NaCl pH 7.4. Then, dried lightly with N<sub>2</sub> for subsequent use.

### **Electrophoretic Analysis of DNA Tetrahedron**

The functional DNA tetrahedron was analyzed using polyacrylamide gel electrophoresis (PAGE, 12.5%) in TAE-Mg buffer at a constant current of 5 mA at 4 °C.

### **Contact Angle Measurement of DTDS**

Contact angle measurement was performed on Tensionmeter-K121 processor (Krüss Company, Germany). The concentration of DNA tetrahedron on the glass was 1.0 μM. The glass substrates were immersed into and retracted from ultra-pure water medium.

### **Characterization of Nonspecific Adsorption**

To characterize the ability of inhibiting nonspecific adsorption on DTDS, different concentrations of functional DNA tetrahedron (0, 0.1, 2.5, 5.0, 1.0, 2.0 μM) were bound to glass. To prepare BSA blocking substrate, PBS buffer containing 5% BSA was incubated with epoxy-functionalized glass substrates for 2 h in 37 °C. All substrates were washed with PBS buffer. A quantity of 50 μL QDs (diluted into 0.2 nM with PBS buffer) was added to it and allowed to react 0.5 h in 37 °C, then washed 3 times with PBS-T (10 mM PBS contains 0.05% Tween-20), PBS, and ultra-pure water, dried lightly with N<sub>2</sub> for subsequent use. Before fluorescence imaging with epi-fluorescence microscopy, 50 μL borate buffer (pH 8.0) was added.

### **Single-Molecule Detection of target DNA on DTDS**

Target DNA detection was performed in the sandwich format. Before use, target DNA and detection DNA were heated to 95 °C and cooled down to room temperature slowly. The target DNA was first mixed with the biotinylated detection DNA (0.1 μM) in hybridization buffer (1 M NaCl and 10 mM TE buffer pH 7.4). Then 50 μL of the above mixture was added to DTDS. After 80 min of incubation in 37 °C, the substrate was rinsed 3 times with PBS, ultra-pure water and incubated with 50 μL QDs (diluted into 0.2 nM with PBS buffer) for 30 min in 37 °C. Next, the substrate was washed 3 times with PBS-T, PBS, ultra-pure water, and dried lightly with N<sub>2</sub>. Before fluorescence imaging with epi-fluorescence microscopy, 50 μL borate buffer (pH 8.0) were added.

### **Epi-Fluorescence Microscopy Imaging**

SMD imaging was performed with an Olympus IX81 fluorescence microscope (Tokyo, Japan) equipped with a high-numerical-aperture 60×(1.45 NA) oil-immersion objective lens, a mercury lamp source, a mirror unit consisting of a 470 to 490 nm excitation filter (BP470-490), a 505 nm dichromatic mirror (DM 505), a > 580 nm emission filter (IF580), and a 16-bit thermoelectrically cooled EMCCD (Cascade 512B, Tucson, AZ, USA). The images corresponding to various locations were acquired by manually moving the XY sample stage. Imaging acquisition and data analysis were performed using the MetaMorph software (Universal Imaging, Downingtown, PA, USA). In order to increase the sensitivity of the assay, the detected target DNA number should be as high as possible.<sup>2</sup> Therefore, 10 images on the substrate were acquired by moving the microscope stage in the x and y direction.

The sum of the bright dots on the 10 images was counted. The fluorescence “blinking” between the ON and OFF state of single QDs affected the capturing of the QDs on the substrate to the images, to address this, repeating images for one location were obtained (three images for each location were acquired).<sup>1a,3</sup> Finally, those images were treated with the software and the bright dots on the images were counted.

### Calculation of the Dots Number in Theory and Detection Efficiency

The dots number in theory was calculated according to following equation

$$N_{theory} = C_{target} \times V \times N_A \times \frac{S_{image}}{S_{well}} \quad (1)$$

$C_{target}$  is the concentration of target DNA;  $V$  stands for the volume of target DNA;  $N_A$  is Avogadro's constant ( $6.02 \times 10^{23}$ );  $S_{image}$  is the actual area of every images,  $S_{well}$  is the area of single chamber on DTDS.

The radius of single chamber on DTDS is 2 mm. So the  $S_{well}$  can be calculated easily. The EMCCD has an imaging region of  $512 \times 512$  pixels with each pixel of  $16 \mu\text{m} \times 16 \mu\text{m}$  in size. The light intensity gradually decreased from the center outward. A  $150 \times 150$  pixels subregion was selected in the method with the  $60 \times$  objective and each pixel imaged  $0.267 \mu\text{m} \times 0.267 \mu\text{m}$  in the object plane.<sup>1b</sup> Thus, the image with an area of  $40 \mu\text{m} \times 40 \mu\text{m}$  on DTDS was used for single-molecule detection. The volume of target DNA was  $50 \mu\text{L}$ . The detection efficiency ( $\eta$ ) was obtained by following equation:

$$\eta = \frac{N_{detection}}{N_{theory}} \times 100\% \quad (2)$$

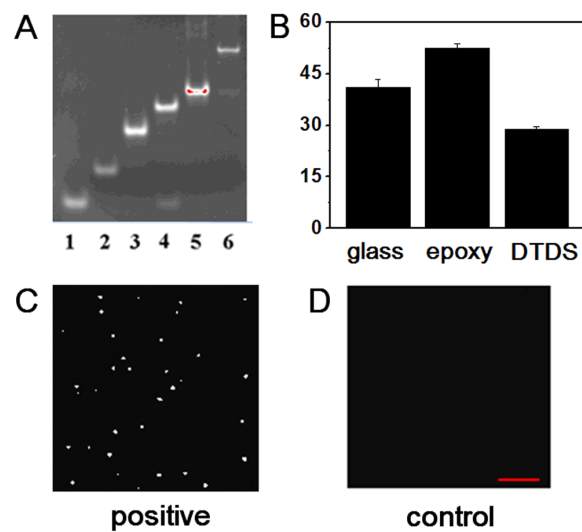

**Fig. S1** Characterization of DNA tetrahedron and DTDS. (A) Electrophoretic analysis of DNA tetrahedron, 1-6 line stand for the electrophoretic image of sequence C (55 bp), A (80 bp), B+C (55bp + 55bp), A+C, B+C+D, A+B+C+D. (B) The contact angle measurement of different substrate, the Y axis stands for the contact angle value. (C) The fluorescence image of single-molecule DNA detection in the presence 100 fM target DNA. (D) The fluorescence image of single-molecule DNA detection in the absence of 100 fM target DNA, scale bar, 8  $\mu$ m.

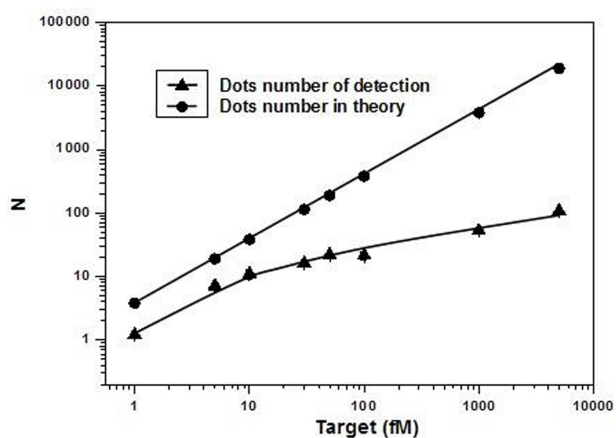

**Fig. S2** Detection efficiencies of different target DNA concentrations. The data points (triangle) are actual target counts at various DNA concentrations, while the dotted line shows the theoretical numbers of target molecules. Condition: Each data point represents an average of 3 measurements (each error bar indicates the standard deviation).

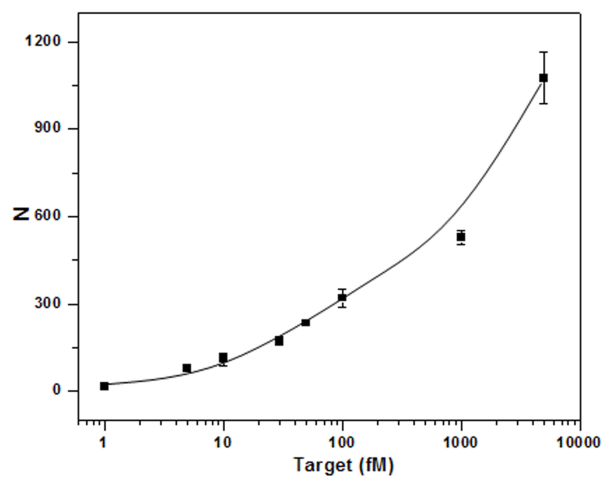

Fig. S3 The relationship between number of dots and concentrations of target DNA. Condition: Each data point represents an average of 3 measurements (each error bar indicates the standard deviation).



**Table S1.** Oligonucleotides Designed in the Present Study.

| Name             | sequence                                                                                               |
|------------------|--------------------------------------------------------------------------------------------------------|
| A                | 5'-GTATCCAGTGGCTCATT TTT TTT TTT TTT ACATTCCCTAAGTCTGAA<br>ACATTA CAGCTTGCTACACGAG AAGAGCCGCCATAGTA-3' |
| B                | 5'-NH <sub>2</sub> -C6-TATCACCAGGCAGTTGACAGTGTAGCAAGCTGTAA<br>TAGAT GCG AGG GTCCA ATAC-3'              |
| C                | 5'-NH <sub>2</sub> -C6-TCAACTGCCTGGTGATAAAACGACACTACGTGGGA<br>ATCTAC TATGGCGGCTCTTC-3'                 |
| D                | 5'-NH <sub>2</sub> -C6-TTCAGACTTAGGAATGTGCTTCCCACGTAGTGTCGT<br>TTGT ATTGGACCCTCGCAT-3'                 |
| target<br>DNA    | 5'-TGAGCCACTGGATACCAAGAGCATTACTAGCATGC-3'                                                              |
| detection<br>DNA | 5'-biotin-GCATGCTAGTAATGCTCTTG -3'                                                                     |
| 1B-M-DN<br>A     | 5'-TGAGCCTCTGGATACCAAGAGCATTACTAGCATGC-3'                                                              |
| 3B-M-DN<br>A     | 5'-TGAGCCTGAGATACCAAGAGCATTACTAGCATGC-3'                                                               |

**Table S2.** Comparison of Methods for Single DNA molecules Detection.

| method       | strategy                                            | detection limit |
|--------------|-----------------------------------------------------|-----------------|
| in solution  |                                                     |                 |
| ref 4        | optical fiber probe excited                         | 2.5 nM          |
| ref 5        | YOYO-1 specific labeled double strands DNA          | 5.0 pM          |
| ref 6        | dual-color fluorescence coincidence detection       | 20 fM           |
| on substrate |                                                     |                 |
| ref 7        | adsorption on poly(L-lysine) coated glass substrate | 16 fM           |
| ref 2        | electrochemical adsorption accumulation             | 3.0 fM          |
| ref 8        | capture by BSA and ethanolamine blocking substrate  | 10 fM           |
| this work    | immobilization on DTDS                              | 1.0 fM          |

## References

- 1 (a) D. Jiang, C. Liu, L. Wang, and W. Jiang, *Anal. Chim. Acta*, 2010, **662**, 170; (b) D. Jiang, Q. Zhang, X. Shen, L. Wang, and W. Jiang, *Talanta*, 2010, **82**, 1003.
- 2 L. Li, X. Tian, G. Zou, Z. Shi, X. Zhang, and W. Jin, *Anal. Chem.*, 2008, **80**, 3999.
- 3 B. Sui, L. Li, L. Li, and W. Jin, *Analyst*, **136**, 3950.
- 4 X. Fang, and W. Tan, *Anal. Chem.*, 1999, **71**, 3101.
- 5 H. M. Chan, L. S. Chan, R. N. Wong, and H. W. Li, *Anal. Chem.*, 2010, **82**, 6911.
- 6 A. Agrawal, C. Zhang, T. Byassee, R. A. Tripp, and S. Nie, *Anal. Chem.*, 2006, **78**, 1061.
- 7 J. Y. Lee, J. Li, and E. S. Yeung, *Anal. Chem.*, 2007, **79**, 8083.
- 8 L. Li, X. Li, L. Li, J. Wang, and W. Jin, *Anal. Chim. Acta*, 2011, **685**, 52.
